# Supplementary material for: Addressing misclassification bias in vaccine effectiveness studies with an application to Covid-19
Source: Springer Nature journal article supplement (doi:10.1186/s12874-023-01853-4), 2023-02-27
Supplement: MOESM1 [file 24071100]

# Supplementary Information

## Addressing Misclassification Bias in Vaccine Effectiveness Studies with an application to Covid-19

*Paolo Eusebi, Niko Speybroeck, Matthew Denwood, Jacob Stærk-Østergaard, Sonja Hartnack, Polychronis Kostoulas*

Corresponding author: Paolo Eusebi, University of Perugia, Italy paoloeusebi@gmail.com

### Load packages/functions

```
library(tidyverse)
library(runjags)
library(rjags)
library(rootSolve)
library(parallel)
library(kableExtra)
source("R/functions.R")
testjags()
```

```
## You are using R version 4.2.2 (2022-10-31 ucrt) on a windows machine,
## with the RTerm GUI
## JAGS version 4.3.1 found successfully using the command 'C:/Program
## Files/JAGS/JAGS-4.3.1/x64/bin/jags-terminal.exe'
## The rjags package is installed
```

# Results from simulation study

Table 1: Results from simulation studies

|                                    | Sp                              | Se V+ | Se V- | True OR | Bias - BM Adjusted | Bias - Unadjusted |                  |
|------------------------------------|---------------------------------|-------|-------|---------|--------------------|-------------------|------------------|
| Non-differential misclassification | 0.99                            | 0.925 | 0.925 | 0.1     | 1.01 (0.82-1.20)   | 1.32 (1.12-1.53)  |                  |
|                                    | 0.99                            | 0.925 | 0.925 | 0.2     | 1.01 (0.87-1.17)   | 1.16 (1.02-1.32)  |                  |
|                                    | 0.99                            | 0.975 | 0.975 | 0.1     | 1.01 (0.83-1.20)   | 1.29 (1.10-1.49)  |                  |
|                                    | 0.99                            | 0.975 | 0.975 | 0.2     | 1.00 (0.87-1.15)   | 1.13 (1.00-1.28)  |                  |
|                                    | 1.00                            | 0.925 | 0.925 | 0.1     | 1.01 (0.85-1.18)   | 1.03 (0.87-1.21)  |                  |
|                                    | 1.00                            | 0.925 | 0.925 | 0.2     | 1.00 (0.89-1.15)   | 1.03 (0.91-1.17)  |                  |
|                                    | 1.00                            | 0.975 | 0.975 | 0.1     | 1.01 (0.85-1.18)   | 1.01 (0.86-1.18)  |                  |
|                                    | 1.00                            | 0.975 | 0.975 | 0.2     | 1.00 (0.89-1.15)   | 1.01 (0.89-1.15)  |                  |
|                                    | Differential missclassification | 0.99  | 0.925 | 0.975   | 0.1                | 1.01 (0.83-1.20)  | 1.23 (1.05-1.43) |
|                                    |                                 | 0.99  | 0.925 | 0.975   | 0.2                | 1.00 (0.88-1.16)  | 1.08 (0.96-1.23) |
| 0.99                               |                                 | 0.975 | 0.925 | 0.1     | 1.01 (0.82-1.21)   | 1.38 (1.17-1.59)  |                  |
| 0.99                               |                                 | 0.975 | 0.925 | 0.2     | 1.00 (0.87-1.16)   | 1.21 (1.06-1.38)  |                  |
| 1.00                               |                                 | 0.925 | 0.975 | 0.1     | 1.01 (0.86-1.19)   | 0.96 (0.82-1.13)  |                  |
| 1.00                               |                                 | 0.925 | 0.975 | 0.2     | 1.00 (0.89-1.15)   | 0.96 (0.85-1.09)  |                  |
| 1.00                               |                                 | 0.975 | 0.925 | 0.1     | 1.01 (0.85-1.17)   | 1.09 (0.92-1.26)  |                  |
| 1.00                               |                                 | 0.975 | 0.925 | 0.2     | 1.00 (0.89-1.14)   | 1.09 (0.96-1.23)  |                  |

BM = Bayesian model; Se V- = sensitivity in unvaccinated; Se V+ = sensitivity in vaccinated; Sp = specificity; OR = Odds Ratio  
 Bias statistics are median (5th - 95th percentiles) of the 1000 simulations ran for each scenario

## Code and MCMC output of illustrative case

### Gibbs sampling set-up.

The MCMC sampling required 100 000 iterations with 50 000 burnin and thin interval 25.

```
inits1 <- list(".RNG.name" = "base::Mersenne-Twister", ".RNG.seed" = 100022)
inits2 <- list(".RNG.name" = "base::Mersenne-Twister", ".RNG.seed" = 300022)

n_thin <- 25
n_burnin <- 50000
n_samples <- 100000
```

### Data from Chung et al. (2021).

A TND study conducted in Ontario, Canada, investigated the effectiveness of mRNA Covid-19 vaccines (bnt162b2 and mrna-1273) against symptomatic SARS-CoV-2 infection. (Chung et al. 2021) The study used linked data from provincial SARS-CoV-2 laboratory testing, Covid-19 vaccination, and health administrative datasets.

In testing positive subjects (cases) 57 were vaccinated and 51 220 unvaccinated. In subjects testing negative (negative-controls) 3 817 were vaccinated and 251 541 unvaccinated

```
y <- matrix(
  c(51220, 251541, 57, 3817),
  nrow = 2,
  byrow = T,
  dimnames = list(c("V-", "V+"), c("T+", "T-"))
)
y
```

```
##      T+      T-
## V- 51220 251541
## V+   57   3817
```

```
N <- apply(y, 1, sum)
N
```

```
##      V-      V+
## 302761  3874
```

## Bayesian models written in JAGS

```
# Bayesian model assuming perfect classification -----
bm_1t_perf <- " model {
  for (i in 1:2) {
    # likelihood
    y[i,1] ~ dbin(pi[i], N[i])
    # priors for prevalence parameters
    pi[i] ~ dbeta(2,2)
  }
  # Computing OR/VE
  OR <- (pi[2]/(1-pi[2])) / (pi[1]/(1-pi[1]))
  VE <- (1-OR)*100
  #data# N, y
  #inits#
  #monitor# pi, OR, VE
}
"
```

```

# Bayesian model for non-differential misclassification -----
bm_1t_nondif <- " model {

  for (i in 1:2) {

# likelihood
y[i,1] ~ dbin(prob[i], N[i])
prob[i] <- pi[i]*Se + (1-pi[i])*(1-Sp)

# priors for prevalence parameters
pi[i] ~ dbeta(2,2)
}

# priors for Se and Sp
Se~dbeta(HPSe[1], HPSe[2])
Sp~dbeta(HPSp[1], HPSp[2])

# Computing OR/VE

OR <- (pi[2]/(1-pi[2])) / (pi[1]/(1-pi[1]))
VE <- (1-OR)*100

#data# N, y, HPSe, HPSp
#inits#
#monitor# Se, Sp, pi, OR, VE

}
"

```

## Model 1: perfect classification

```
res_perfect <- run.jags(  
  bm_1t_perf,  
  n.chains = 2,  
  inits = list(inits1, inits2),  
  burnin = n_burnin,  
  sample = n_samples,  
  thin = n_thin  
)
```

```
## Compiling rjags model...  
## Calling the simulation using the rjags method...  
## Adapting the model for 1000 iterations...  
## Burning in the model for 50000 iterations...  
## Running the model for 2500000 iterations...  
## Simulation complete  
## Calculating summary statistics...  
## Calculating the Gelman-Rubin statistic for 4 variables....  
## Finished running the simulation
```

```
round(summary(res_perfect), 3)
```

| ##       | Lower95 | Median | Upper95 | Mean   | SD    | Mode | MCerr | MC%ofSD | SSeff | AC.250 | psrf |
|----------|---------|--------|---------|--------|-------|------|-------|---------|-------|--------|------|
| ## pi[1] | 0.168   | 0.169  | 0.171   | 0.169  | 0.001 | NA   | 0.000 | 0.7     | 20000 | 0.002  | 1    |
| ## pi[2] | 0.012   | 0.015  | 0.019   | 0.015  | 0.002 | NA   | 0.000 | 0.7     | 20405 | 0.002  | 1    |
| ## OR    | 0.057   | 0.075  | 0.096   | 0.076  | 0.010 | NA   | 0.000 | 0.7     | 20382 | 0.002  | 1    |
| ## VE    | 90.409  | 92.460 | 94.269  | 92.404 | 0.996 | NA   | 0.007 | 0.7     | 20382 | 0.002  | 1    |

```
plot(  
  res_perfect,  
  plot.type = c("histogram", "trace", "autocorr"),  
  vars = c("pi", "OR", "VE"),  
  layout = c(4, 3)  
)
```

```
## Generating plots...
```

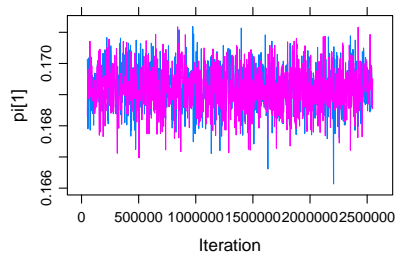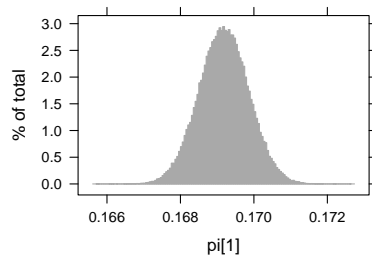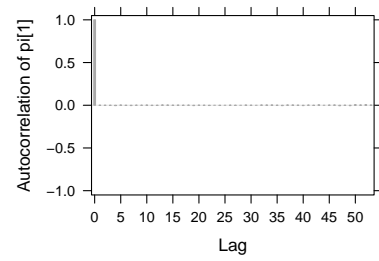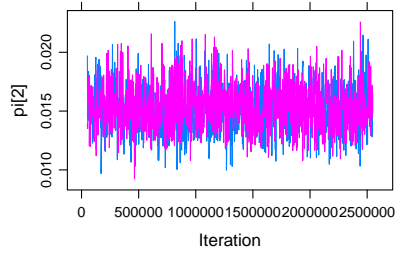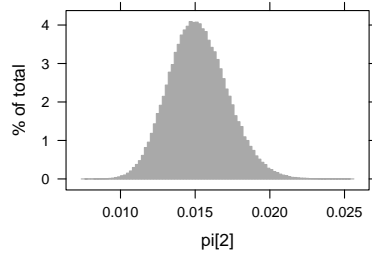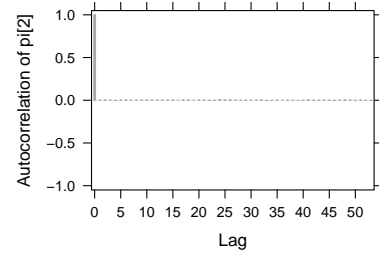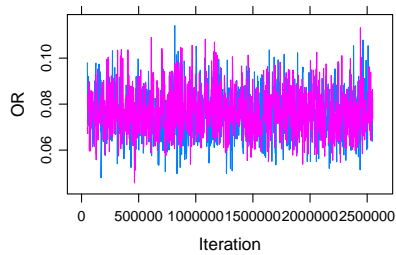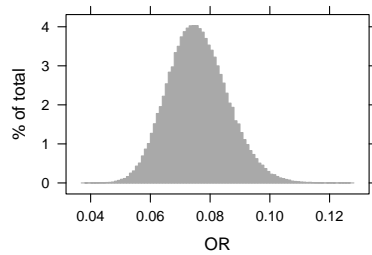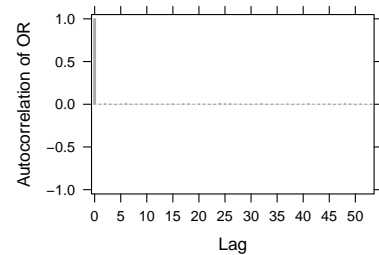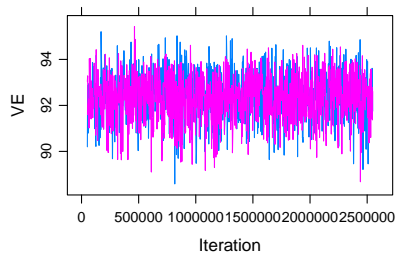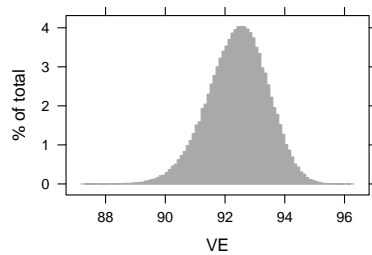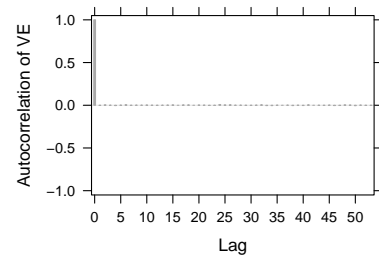

## Model 2: sensitivity and specificity from Kostoulas, Eusebi, and Hartnack (2021)

Kostoulas and colleagues (Kostoulas, Eusebi, and Hartnack 2021) used a Bayesian latent class model to estimate the diagnostic accuracy of RT-PCR and lateral flow immunoassay tests for Covid-19. The sensitivity of RT-PCR was 0.68 (95% PrI=0.63-0.73), while the specificity was 0.99 (95% PrI=0.98-1.00).

We plugged-in this prior information in our model by using a Beta(226.16, 105.93) prior for the sensitivity and a Beta(287.48, 2.14) prior for the specificity.

```
HPSe <- findbetaqq2(  
  percentile.value1 = 0.63,  
  percentile1 = 0.025,  
  percentile.value2 = 0.73,  
  percentile2 = 0.975  
)  
HPSe
```

```
## [1] 226.16 105.93
```

```
round(qbeta(c(0.025, 0.5, 0.975), # check  
  HPSe[1], HPSe[2]), 2)
```

```
## [1] 0.63 0.68 0.73
```

```
HPSp <- findbeta2(  
  themedian = 0.99,  
  percentile = 0.975,  
  lower.v = FALSE,  
  percentile.value = 0.98  
)  
HPSp
```

```
## [1] 606.34 6.45
```

```
round(qbeta(c(0.025, 0.5, 0.975), # check  
  HPSp[1], HPSp[2]), 3)
```

```
## [1] 0.980 0.990 0.996
```

```
res_kostoulas <- run.jags(  
  bm_1t_nondif,  
  n.chains = 2,  
  inits = list(inits1, inits2),  
  burnin = n_burnin,  
  sample = n_samples,  
  thin = n_thin  
)
```

```
## Compiling rjags model...  
## Calling the simulation using the rjags method...  
## Adapting the model for 1000 iterations...
```



```
## Burning in the model for 50000 iterations...
## Running the model for 2500000 iterations...
## Simulation complete
## Calculating summary statistics...
## Calculating the Gelman-Rubin statistic for 6 variables....
## Note: Unable to calculate the multivariate psrf
## Finished running the simulation
```

```
round(summary(res_kostoulas), 3)
```

| ##       | Lower95 | Median | Upper95 | Mean   | SD    | Mode | MCerr | MC%ofSD | SSEff | AC.250 | psrf |
|----------|---------|--------|---------|--------|-------|------|-------|---------|-------|--------|------|
| ## Se    | 0.626   | 0.678  | 0.728   | 0.677  | 0.026 | NA   | 0.00  | 0.8     | 14469 | 0.160  | 1    |
| ## Sp    | 0.987   | 0.992  | 0.997   | 0.992  | 0.003 | NA   | 0.00  | 0.7     | 20000 | 0.004  | 1    |
| ## pi[1] | 0.223   | 0.241  | 0.262   | 0.241  | 0.010 | NA   | 0.00  | 0.8     | 14725 | 0.167  | 1    |
| ## pi[2] | 0.002   | 0.011  | 0.020   | 0.011  | 0.004 | NA   | 0.00  | 0.7     | 20000 | 0.012  | 1    |
| ## OR    | 0.009   | 0.036  | 0.063   | 0.036  | 0.014 | NA   | 0.00  | 0.7     | 20000 | 0.004  | 1    |
| ## VE    | 93.700  | 96.405 | 99.051  | 96.384 | 1.391 | NA   | 0.01  | 0.7     | 20000 | 0.004  | 1    |

```
plot(
  res_kostoulas,
  plot.type = c("histogram", "trace", "autocorr"),
  vars = c("Se", "Sp", "pi", "OR", "VE"),
  layout = c(6, 3)
)
```

```
## Generating plots...
```

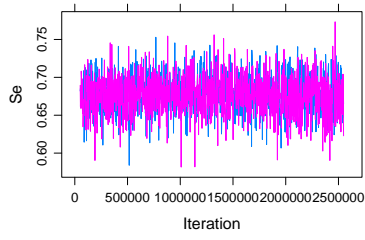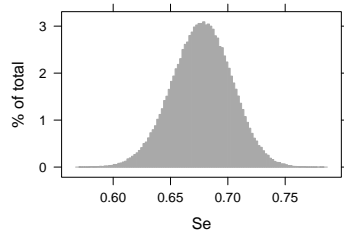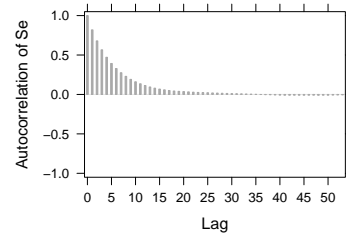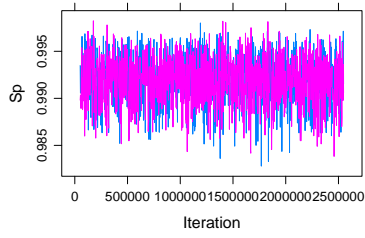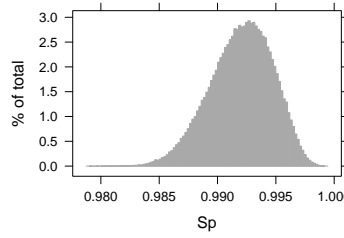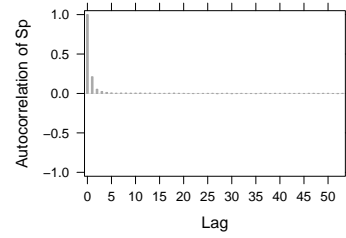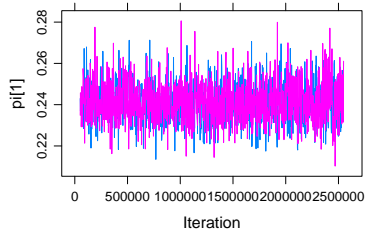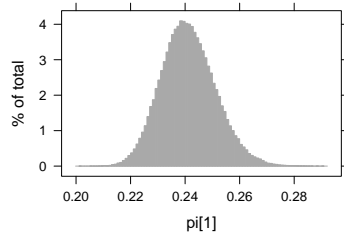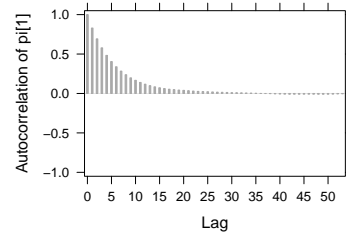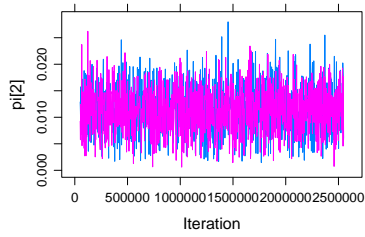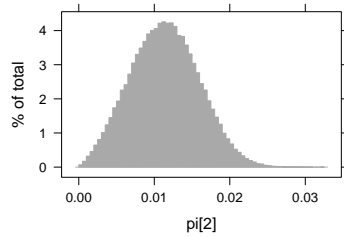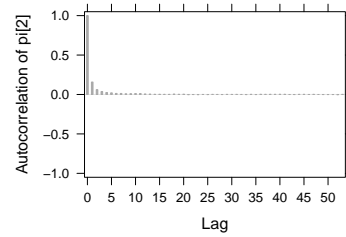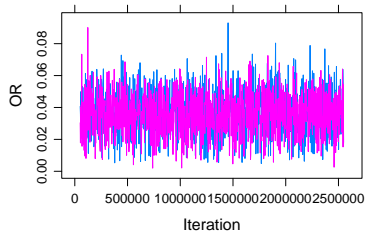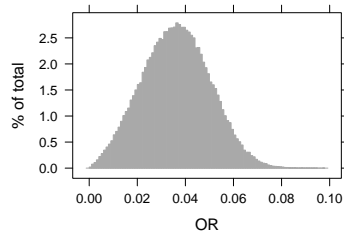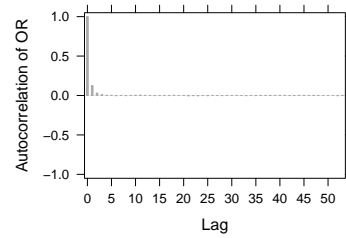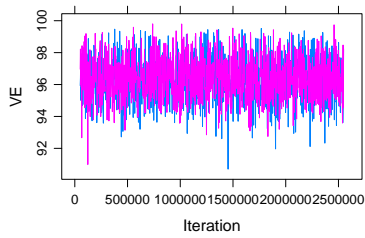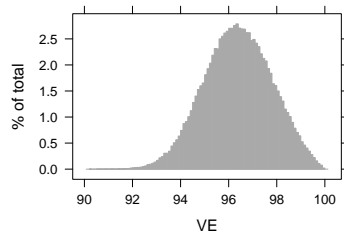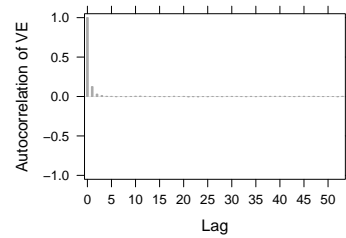

### Model 3: sensitivity and specificity from Stærk-Østergaard et al. (2021)

A recent report using Danish registries data used a Bayesian latent class model to estimate the diagnostic accuracy of RT-PCR and antigen tests for Covid-19.(Stærk-Østergaard et al. 2021) The specificity of RT-PCR was estimated to be close to 1.00. The sensitivity estimates were 0.957 (95% PrI=0.928-0.984). We plugged-in this prior information in our model by using a Beta(3040.61, 3.64) prior for the specificity and a Beta(168.66, 6.84) prior for the sensitivity.

```
# Sp
HPSp <- findbetaqq2(
  percentile.value1 = 0.9973,
  percentile1 = 0.025,
  percentile.value2 = 0.9997,
  percentile2 = 0.975
)
HPSp
```

```
## [1] 3040.61    3.64
```

```
round(qbeta(c(0.025, 0.5, 0.975),
            HPSp[1], HPSp[2]), 4)
```

```
## [1] 0.9973 0.9989 0.9997
```

```
# Se
HPSe <- findbetaqq2(
  percentile.value1 = 0.9279,
  percentile1 = 0.025,
  percentile.value2 = 0.9843,
  percentile2 = 0.975
)
HPSe
```

```
## [1] 168.66    6.84
```

```
round(qbeta(c(0.025, 0.5, 0.975),
            HPSe[1], HPSe[2]), 4)
```

```
## [1] 0.9279 0.9628 0.9843
```

```
res_staerk <- run.jags(
  bm_1t_nondif,
  n.chains = 2,
  inits = list(inits1, inits2),
  burnin = n_burnin,
  sample = n_samples,
  thin = n_thin
)
```

```
## Compiling rjags model...
```

```
## Calling the simulation using the rjags method...
```

```

## Adapting the model for 1000 iterations...
## Burning in the model for 50000 iterations...
## Running the model for 2500000 iterations...
## Simulation complete
## Calculating summary statistics...
## Calculating the Gelman-Rubin statistic for 6 variables....
## Note: Unable to calculate the multivariate psrf
## Finished running the simulation

```

```
round(summary(res_staerk), 3)
```

| ##       | Lower95 | Median | Upper95 | Mean   | SD    | Mode | MCerr | MC%ofSD | SSEff | AC.250 | psrf |
|----------|---------|--------|---------|--------|-------|------|-------|---------|-------|--------|------|
| ## Se    | 0.931   | 0.962  | 0.987   | 0.960  | 0.015 | NA   | 0.000 | 0.7     | 20000 | 0.000  | 1    |
| ## Sp    | 0.998   | 0.999  | 1.000   | 0.999  | 0.001 | NA   | 0.000 | 0.7     | 20598 | 0.000  | 1    |
| ## pi[1] | 0.170   | 0.175  | 0.181   | 0.175  | 0.003 | NA   | 0.000 | 0.7     | 20000 | 0.002  | 1    |
| ## pi[2] | 0.011   | 0.015  | 0.019   | 0.015  | 0.002 | NA   | 0.000 | 0.7     | 20000 | 0.000  | 1    |
| ## OR    | 0.050   | 0.070  | 0.090   | 0.070  | 0.010 | NA   | 0.000 | 0.7     | 20000 | 0.000  | 1    |
| ## VE    | 90.965  | 93.030 | 95.006  | 92.993 | 1.033 | NA   | 0.007 | 0.7     | 20000 | 0.000  | 1    |

```

plot(
  res_staerk,
  plot.type = c("histogram", "trace", "autocorr"),
  vars = c("Se", "Sp", "pi", "OR", "VE"),
  layout = c(6, 3)
)

```

```
## Generating plots...
```

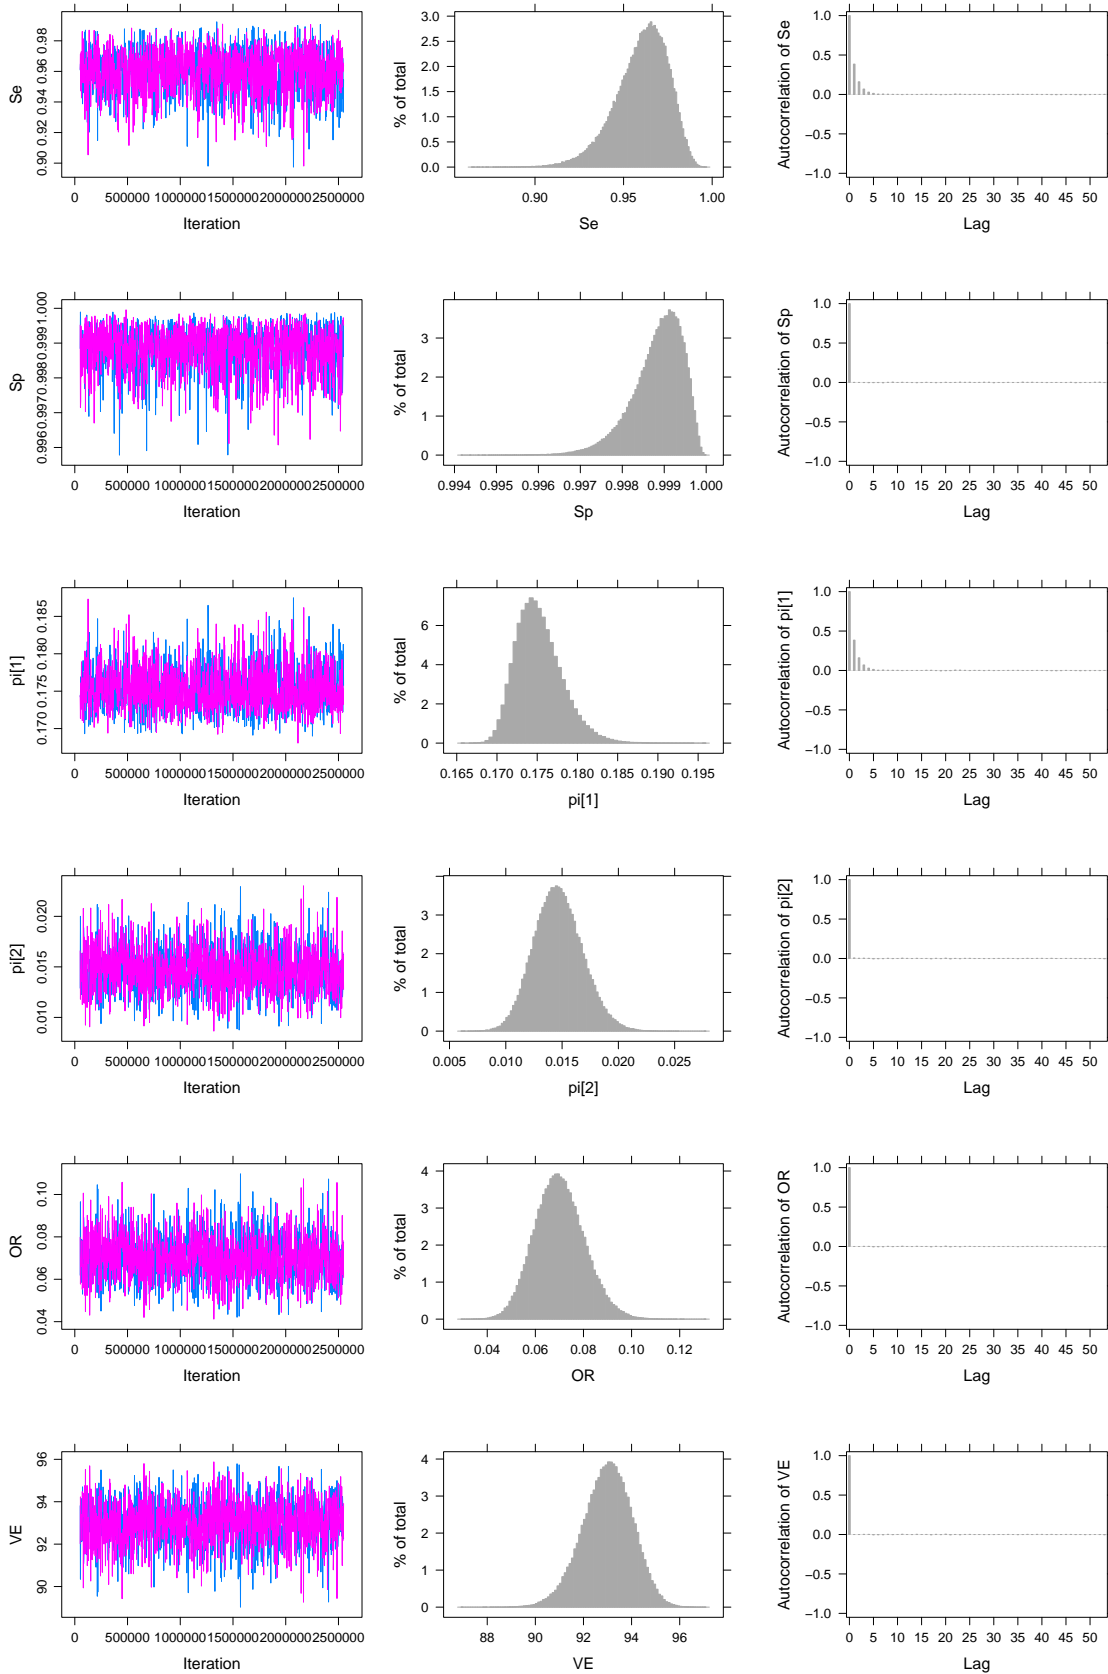

## Code availability

Code available at <https://github.com/paoloeusebi/tnd-vaccine-effectiveness/>

## References

- Chung, Hannah, Siyi He, Sharifa Nasreen, Maria E Sundaram, Sarah A Buchan, Sarah E Wilson, Branson Chen, et al. 2021. “Effectiveness of BNT162b2 and mRNA-1273 Covid-19 Vaccines Against Symptomatic SARS-CoV-2 Infection and Severe Covid-19 Outcomes in Ontario, Canada: Test Negative Design Study.” *BMJ* 374. <https://doi.org/10.1136/bmj.n1943>.
- Kostoulas, Polychronis, Paolo Eusebi, and Sonja Hartnack. 2021. “Diagnostic Accuracy Estimates for COVID-19 Real-Time Polymerase Chain Reaction and Lateral Flow Immunoassay Tests With Bayesian Latent-Class Models.” *American Journal of Epidemiology* 190 (8): 1689–95. <https://doi.org/10.1093/aje/kwab093>.
- Stærk-Østergaard, Jacob, Carsten Kirkeby, Lasse Engbo Christiansen, Michael Asger Andersen, Camilla Holten Møller, Marianne Voldstedlund, and Matthew J Denwood. 2021. “Evaluation of Diagnostic Test Procedures for SARS-CoV-2 Using Latent Class Models: Comparison of Antigen Test Kits and Sampling for PCR Testing Based on Danish National Data Registries.” *arXiv Preprint arXiv:2112.11298*.
